# Supplementary material for: Potent and broad neutralization of HIV-1 by a llama antibody elicited by immunization
Source: PubMed Central journal article supplement — J Exp Med. 2012 Jun 4;209(6):1091–103. doi: 10.1084/jem.20112655 (PMC3371729; doi:10.1084/jem.20112655), 2012-06-04
Supplement: supp_jem.20112655_JEM_20112655_sm.pdf [file supp_jem.20112655_JEM_20112655_sm.pdf]

**Table S1.** Immunization schedule

| Day | Immunization                                               | Tissue collection     |
|-----|------------------------------------------------------------|-----------------------|
| 0   | 50 µg Gp140 <sub>UG37</sub><br>50 µg Gp140 <sub>CN54</sub> | 10 ml preimmune blood |
| 7   | 50 µg Gp140 <sub>UG37</sub><br>50 µg Gp140 <sub>CN54</sub> |                       |
| 14  | 25 µg Gp140 <sub>UG37</sub><br>25 µg Gp140 <sub>CN54</sub> |                       |
| 21  | 25 µg Gp140 <sub>UG37</sub><br>25 µg Gp140 <sub>CN54</sub> | 10 ml immune blood    |
| 28  | 25 µg Gp140 <sub>UG37</sub><br>25 µg Gp140 <sub>CN54</sub> |                       |
| 30  |                                                            | 150 ml immune blood   |
| 35  | 25 µg Gp140 <sub>UG37</sub><br>25 µg Gp140 <sub>CN54</sub> |                       |
| 43  |                                                            | 150 ml immune blood   |
| 113 | 25 µg Gp140 <sub>UG37</sub><br>25 µg Gp140 <sub>CN54</sub> | 10 ml immune blood    |
| 122 |                                                            | 150 ml immune blood   |

An *L. glama*, designated llama 8, received seven intramuscular injections with recombinant Gp140<sub>CN54</sub> and Gp140<sub>UG37</sub> on the days indicated. Each injection consisted of recombinant Env at the required concentrations combined with the adjuvant Stimune. The anti-Env immune response in sera was verified by ELISA and retrospectively by TZM-bl neutralization assay (Fig. 1). A pCAD50 phagemid library (library 8) was generated from peripheral blood lymphocytes taken on day 122 after immunization. This llama was one of two animals immunized in parallel.

Table S2, included as an Excel file, shows VHH IC50 titers against HIV-1 in TZM-bl cells.

Table S3, included as an Excel file, shows mAb IC50 titers against a matched subset of HIV-1 strains in TZM-bl cells.
